# Supplementary material for: Highly selective and sensitive detection of heparin based on competition-modulated assembly and disassembly of fluorescent gold nanoclusters
Source: Royal Society of Chemistry journal article supplement (doi:10.1039/c6nj03155b), 2016-12-09
Supplement: c6nj03155b1.pdf [file c6nj03155b1.pdf]

*New Journal of Chemistry*

**Electronic Supplementary Information**

**Highly selective and sensitive detection of heparin based on  
competition-modulated assembly and disassembly of fluorescent gold  
nanoclusters**

Sha Li, Pengcheng Huang, Fangying Wu\*

College of Chemistry, Nanchang University, Nanchang 330031, China

\*Corresponding Author: Fangying Wu, fywu@ncu.edu.cn. Tel: + 86 79183969882, Fax: + 86  
7918396951.

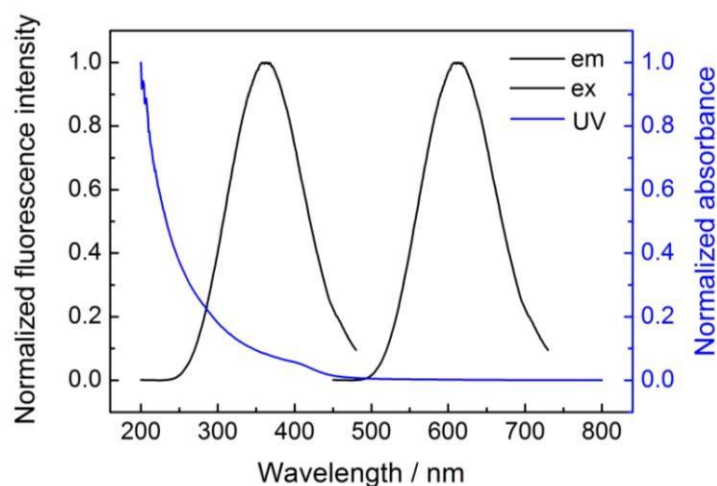

**Fig. S1** UV-vis (blue), fluorescence emission, and excitation spectra (black) of GSH-Au NCs.

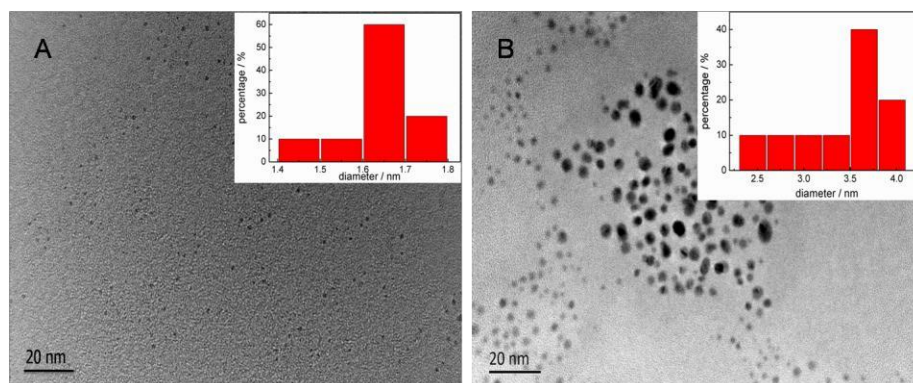

**Fig. S2** TEM images of the GSH-Au NCs in the absence (A) and presence (B) of CTAB, respectively. The insets are the corresponding histograms of the size distribution of Au NCs.

**Table S1** Summary of fluorescence lifetimes of GSH-Au NCs, GSH-Au NCs/CTAB, and Au NCs/CTAB/heparin ( $\lambda_{em} = 610$  nm).

| Sample                  | $\tau$ (ns) |
|-------------------------|-------------|
| GSH-Au NCs              | 2.94        |
| GSH-Au NCs+CTAB         | 6.48        |
| GSH-Au NCs+CTAB+heparin | 2.36        |

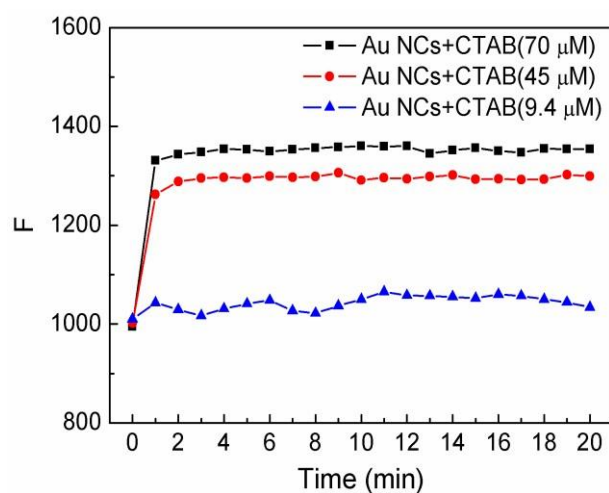

**Fig. S3** Time-dependent fluorescence intensity of GSH-Au NCs at 610 nm upon addition of different concentrations of CTAB (9.4, 45, and 70  $\mu\text{M}$ , respectively).

**Table S2** Comparison of the linear range and detection limit of heparin detection by different methods.

| Sensor                                       | Method           | Linear range<br>( $\mu\text{g/mL}$ ) | LOD<br>( $\text{ng/mL}$ ) | Ref. |
|----------------------------------------------|------------------|--------------------------------------|---------------------------|------|
| P4Me-3TOEIM                                  | Colorimetric     | 0–108                                | 180                       | S1   |
| AuNRs/GO                                     | Colorimetric     | 0.02–0.28                            | 5                         | S2   |
| [C <sub>12</sub> mim][Cl]-AuNPs              | Colorimetric     | 0.012–6.260                          | 10                        | S3   |
| PEI-AgNCs                                    | RLS              | 1.8–180                              | 515                       | S4   |
| 4-MPY-AgNPs                                  | SERS             | 0.0005–0.15                          | 0.5                       | S5   |
| Fe(CN) <sub>6</sub> <sup>3-</sup> /Pim/MWCNT | Electrochemistry | 9–180                                | –                         | 16   |
| Silole derivative                            | Fluorescence     | 14.4–57.6                            | 431                       | 17   |
| Pyrene derivative                            | Fluorescence     | 90–540                               | 2940                      | 18   |
| Polyfluorene derivative                      | Fluorescence     | 0.56–864                             | –                         | 22   |
| PFBTs                                        | Fluorescence     | 0–648                                | –                         | 23   |
| A-based molecular beacon                     | Fluorescence     | 0.18–1.8                             | 60                        | 24   |
| A <sub>20</sub> -coralyne complex            | Fluorescence     | 0.18–1.8                             | 75                        | 25   |
| Phloxine B/PEI                               | Fluorescence     | 0.12–18.7                            | 94                        | 26   |
| Copolymer                                    | Fluorescence     | 0.56–4.12                            | –                         | 27   |

|                 |              |           |      |           |
|-----------------|--------------|-----------|------|-----------|
| GO/ScGFP        | Fluorescence | 0.05–1    | –    | 28        |
| SPEET/try-AuNCs | Fluorescence | 0.1–4.0   | 50   | 30        |
| SiQDs-AuNPs     | Fluorescence | 0.002–1.4 | 0.67 | 31        |
| GSH-AuNCs/CTAB  | Fluorescence | 0.1–1.6   | 75   | This work |

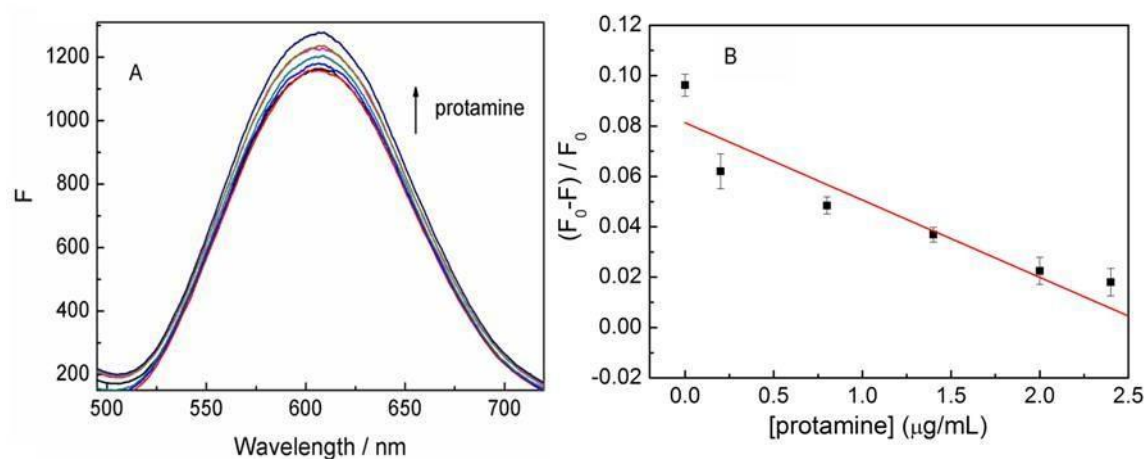

**Fig. S4** (A) Fluorescent spectra of GSH-Au NCs/CTAB solution upon addition of the mixture of heparin (0.7  $\mu\text{g/mL}$ ) and protamine at various concentrations. The concentrations of protamine (from bottom to top) were 0, 0.2, 0.8, 1.4, 2.0, and 2.4  $\mu\text{g/mL}$ , respectively. (B) The linear fitting of the relative fluorescent intensity versus concentrations of protamine.  $F_0$  and  $F$  correspond to the fluorescence intensity of GSH-Au NCs/CTAB at 610 nm in the absence and presence of the mixture of heparin and protamine, respectively. The concentration of Au NCs used in the assay is 0.0625 mg/mL in PBS (pH 7.4, 0.01 M). The error bars represent standard deviations of three independent measurements.

## References

- S1. R. Zhan, Z. Fang, B. Liu, *Anal. Chem.*, 2009, **82**, 1326–1333.
- S2. X. Fu, L. Chen, J. Li, M. Lin, H. You, W. Wang, *Biosens. Bioelectron.*, 2012, **34**, 227–231.
- S3. B. Hemmateenejad, S. Dorostkar, F. Shakerizadeh-Shirazia, M. Shamsipur, *Analyst*, 2013, **138**, 4830–4837.
- S4. Y. Tang, Y. Zhang, Y. Su, Y. Lv, *Talanta*, 2013, **115**, 830–836.

S5. X. Wang, L. Chen, X. Fu, L. Chen, Y. Ding, *ACS Appl. Mater. Interfaces*, 2013, **5**, 11059–11065.
